# Supplementary material for: Synthesis and Evaluation of the Cytotoxic Activity of Water-Soluble Cationic Organometallic Complexes of the Type [Pt(η1-C2H4OMe)(L)(Phen)]+ (L = NH3, DMSO; Phen = 1,10-Phenanthroline)
Source: MDPI journal article supplement (doi:10.3390/pharmaceutics13050642), 2021-04-30
Supplement: s1 [file s1]

# Supplementary Materials: Synthesis and Evaluation of the Cytotoxic Activity of Water-Soluble Cationic Organometallic Complexes of the Type $[\text{Pt}(\eta^1\text{-C}_2\text{H}_4\text{OMe})(\text{L})(\text{Phen})]^+$ ( $\text{L} = \text{NH}_3$ , DMSO; $\text{Phen} = 1,10\text{-Phenanthroline}$ )

Federica De Castro, Erika Stefàno, Danilo Migoni, Giorgia N. Iaconisi, Antonella Muscella, Santo Marsigliante, Michele Benedetti and Francesco P. Fanizzi

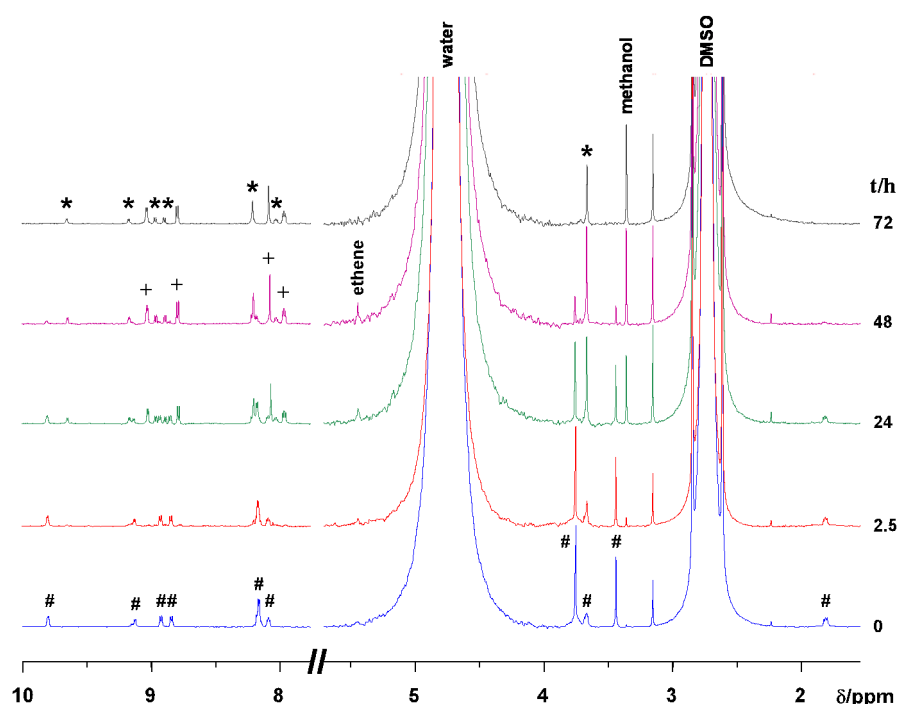

**Figure S1.** Hydrolysis of the  $[\text{Pt}(\eta^1\text{-C}_2\text{H}_4\text{OMe})(\text{DMSO})(\text{phen})]\text{Cl}$  (3, #) complex, dissolved in a neutral water/DMSO mixture ( $\text{D}_2\text{O}/\text{DMSO} = 90/10$ ), followed by  $^1\text{H}$  NMR spectroscopy. In the 0-72 h time interval, it is shown a progressive formation of the  $[\text{Pt}(\text{DMSO})(\text{OH})(\text{phen})]^+$  (\*) and  $[\{\text{Pt}(\mu\text{-OH})(\text{phen})\}_2]^{2+}$  (+) species, as a consequence of complex 3 hydrolysis.

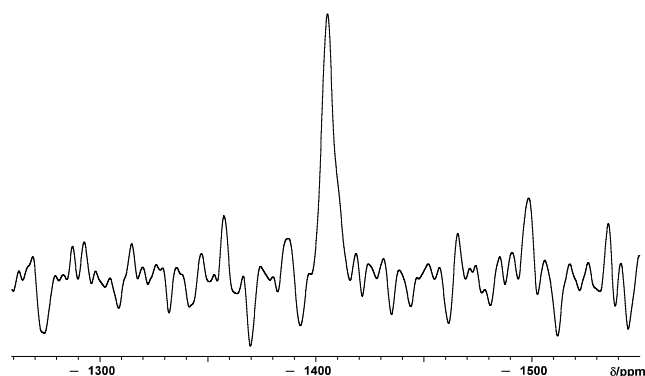

**Figure S2.**  $^{195}\text{Pt}$  NMR signal revealed for a  $\text{D}_2\text{O}$  solution of the  $[\text{Pt}(\eta^1\text{-C}_2\text{H}_4\text{OMe})(\text{DMSO})(\text{phen})]\text{Cl} \cdot 2\text{DMSO}$  (3·2DMSO) complex, left to hydrolyze in  $\text{D}_2\text{O}$  for three days at room temperature. The observed  $^{195}\text{Pt}$  NMR signal is attributable to formation of the  $[\{\text{Pt}(\mu\text{-OH})(\text{phen})\}_2]^{2+}$  dimeric hydrolysis product [1].

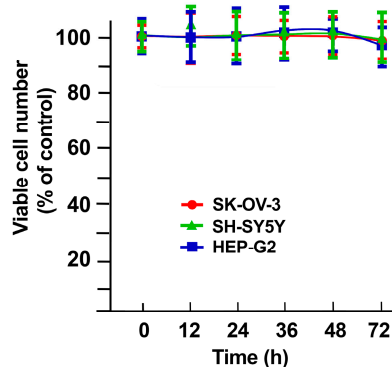

**Figure S3.** Viability of cell lines was evaluated in the incubation medium and 0.725% DMSO for 12, 24, 48, and 72 h. The data are means  $\pm$  S.D. of three different experiments run in eight replicates and are presented as percent of control.

**Table S1.** IC<sub>50</sub> values measured after [Pt( $\eta^1$ -C<sub>2</sub>H<sub>4</sub>OMe)(DMSO)(phen)]<sup>+</sup> and *cisplatin* treatment, at different concentrations (0.1, 1, 10, 100 and 200  $\mu$ M) and time intervals, for the eight tested human cancer cell lines.

| Cell lines | IC <sub>50</sub> ( $\mu$ M), 12 h |                                                                             | IC <sub>50</sub> ( $\mu$ M), 24 h |                                                                             | IC <sub>50</sub> ( $\mu$ M), 48 h |                                                                             | IC <sub>50</sub> ( $\mu$ M), 72 h |                                                                             |
|------------|-----------------------------------|-----------------------------------------------------------------------------|-----------------------------------|-----------------------------------------------------------------------------|-----------------------------------|-----------------------------------------------------------------------------|-----------------------------------|-----------------------------------------------------------------------------|
|            | <i>Cisplatin</i>                  | [Pt( $\eta^1$ -C <sub>2</sub> H <sub>4</sub> OMe)(DMSO)(phen)] <sup>+</sup> | <i>Cisplatin</i>                  | [Pt( $\eta^1$ -C <sub>2</sub> H <sub>4</sub> OMe)(DMSO)(phen)] <sup>+</sup> | <i>Cisplatin</i>                  | [Pt( $\eta^1$ -C <sub>2</sub> H <sub>4</sub> OMe)(DMSO)(phen)] <sup>+</sup> | <i>Cisplatin</i>                  | [Pt( $\eta^1$ -C <sub>2</sub> H <sub>4</sub> OMe)(DMSO)(phen)] <sup>+</sup> |
| Caco-2     | >200                              | >200                                                                        | >200                              | >200                                                                        | 176.8 $\pm$ 9.2                   | 115.0 $\pm$ 9.5                                                             | 81.0 $\pm$ 5.4                    | 67.0 $\pm$ 6.4                                                              |
| HeLa       | >200                              | 69.8 $\pm$ 5.0                                                              | 81.5 $\pm$ 7.9                    | 74.7 $\pm$ 5.9                                                              | 6.3 $\pm$ 1.2                     | 62.9 $\pm$ 5.4                                                              | 2.1 $\pm$ 0.7                     | 17.9 $\pm$ 2.8                                                              |
| Hep-G2     | >200                              | >200                                                                        | >200                              | 178.5 $\pm$ 9.3                                                             | 137.0 $\pm$ 7.8                   | 160.7 $\pm$ 7.4                                                             | 79.8 $\pm$ 6.9                    | 108.9 $\pm$ 6.5                                                             |
| MCF-7      | >200                              | 76.4 $\pm$ 6.1                                                              | >200                              | 61.7 $\pm$ 5.3                                                              | 115.0 $\pm$ 9.8                   | 51.3 $\pm$ 4.2                                                              | 56.3 $\pm$ 4.6                    | 39.5 $\pm$ 3.5                                                              |
| Mg-63      | >200                              | 62.0 $\pm$ 5.1                                                              | 65.6 $\pm$ 5.2                    | 57.6 $\pm$ 4.2                                                              | 35.8 $\pm$ 3.9                    | 46.1 $\pm$ 4.2                                                              | 21.4 $\pm$ 4.9                    | 41.1 $\pm$ 3.1                                                              |
| SH-SY5Y    | >200                              | 56.9 $\pm$ 7.7                                                              | 50.0 $\pm$ 9.6                    | 45.8 $\pm$ 7.8                                                              | 20.8 $\pm$ 4.8                    | 46.1 $\pm$ 4.2                                                              | 5.4 $\pm$ 2.6                     | 15.1 $\pm$ 2.6                                                              |
| SK-OV-3    | >200                              | 92.1 $\pm$ 7.8                                                              | 130 $\pm$ 8.9                     | 62.8 $\pm$ 6.6                                                              | 69.8 $\pm$ 6.9                    | 48.2 $\pm$ 5.9                                                              | 41.7 $\pm$ 4.6                    | 37.5 $\pm$ 3.2                                                              |
| ZL-55      | >200                              | 139.1 $\pm$ 6.8                                                             | 53.3 $\pm$ 5.0                    | 79.2 $\pm$ 5.4                                                              | 36.7 $\pm$ 3.1                    | 41.1 $\pm$ 3.4                                                              | 3.8 $\pm$ 1.2                     | 40.1 $\pm$ 3.5                                                              |

**Table S2.** Total Pt intracellular accumulation, determined by ICP-AES, in SH-SY5Y, SK-OV-3 and Hep-G2 cell lines, exposed to 100  $\mu$ M of each Pt-compound for the indicated time. Each point represents the means  $\pm$  S.D. of three different experiments and are indicated as ng of Pt(II)/mg of protein.

| Cell Lines                                                                                                   | 1.5 h            | 3.0 h            | 4.5 h            | 6.0 h            | 12 h             |
|--------------------------------------------------------------------------------------------------------------|------------------|------------------|------------------|------------------|------------------|
| <i>Cisplatin</i><br>(ngPt/mg protein)                                                                        |                  |                  |                  |                  |                  |
| Hep-G2                                                                                                       | 2.0 $\pm$ 10.5   | 55.5 $\pm$ 23.8  | 88.8 $\pm$ 31.0  | 69.1 $\pm$ 28.3  | 80.0 $\pm$ 35.0  |
| SH-SY5Y                                                                                                      | 67.1 $\pm$ 18.0  | 80.5 $\pm$ 24.2  | 107.3 $\pm$ 23.4 | 122.3 $\pm$ 29.8 | 155.9 $\pm$ 31.4 |
| SK-OV-3                                                                                                      | 0                | 0                | 0                | 12.1 $\pm$ 16.70 | 30.0 $\pm$ 20.2  |
| [Pt( $\eta^1$ -C <sub>2</sub> H <sub>4</sub> OMe)(DMSO)(phen)] <sup>+</sup><br>(ngPt/mg protein)             |                  |                  |                  |                  |                  |
| Hep-G2                                                                                                       | 81.3 $\pm$ 36.3  | 84.5 $\pm$ 39.1  | 132.7 $\pm$ 46.1 | 75.2 $\pm$ 39.7  | 98.0 $\pm$ 41.5  |
| SH-SY5Y                                                                                                      | 332.8 $\pm$ 34.6 | 365.4 $\pm$ 35.5 | 371.1 $\pm$ 37.9 | 389.9 $\pm$ 34.7 | 430.5 $\pm$ 40.4 |
| SK-OV-3                                                                                                      | 368.4 $\pm$ 45.2 | 377.7 $\pm$ 58.9 | 497.6 $\pm$ 58.1 | 465.8 $\pm$ 58.8 | 480.0 $\pm$ 55.6 |
| [Pt( $\eta^1$ -C <sub>2</sub> H <sub>4</sub> OMe)(NH <sub>3</sub> )(phen)] <sup>+</sup><br>(ngPt/mg protein) |                  |                  |                  |                  |                  |
| Hep-G2                                                                                                       | 649.3 $\pm$ 44.8 | 771.8 $\pm$ 46.7 | 738.7 $\pm$ 49.6 | 695.4 $\pm$ 59.6 | 711.0 $\pm$ 69.8 |
| SH-SY5Y                                                                                                      | 220.6 $\pm$ 30.1 | 237.2 $\pm$ 35.0 | 260.0 $\pm$ 37.1 | 277.4 $\pm$ 37.5 | 300.1 $\pm$ 30.3 |
| SK-OV-3                                                                                                      | 0                | 77.0 $\pm$ 45.0  | 87.6 $\pm$ 40.2  | 95.8 $\pm$ 42.1  | 140.0 $\pm$ 45.8 |

## Reference

1. Wimmer, S.; Castan, P.; Wimmer, F.L.; Johnson, N.P. Preparation and Interconversion of Dimeric Di- $\mu$ -Hydroxo and Tri- $\mu$ -Hydroxo Complexes of Platinum(II) and Palladium(II) with 2,2'-Bipyridine and 1,10-Phenanthroline. *J. Chem. Soc. Dalton Trans.* **1989**, 3, 403–412, doi:10.1039/DT9890000403.
